# Supplementary material for: SphK1-targeted miR-6784 inhibits functions of skin squamous cell carcinoma cells
Source: publisher site journal article supplement (doi:10.18632/aging.202336), 2021-01-19
Supplement: Supplementary file [file aging-v13i3-202336-supplementary-material-SD1.pdf]

## SUPPLEMENTARY FIGURE

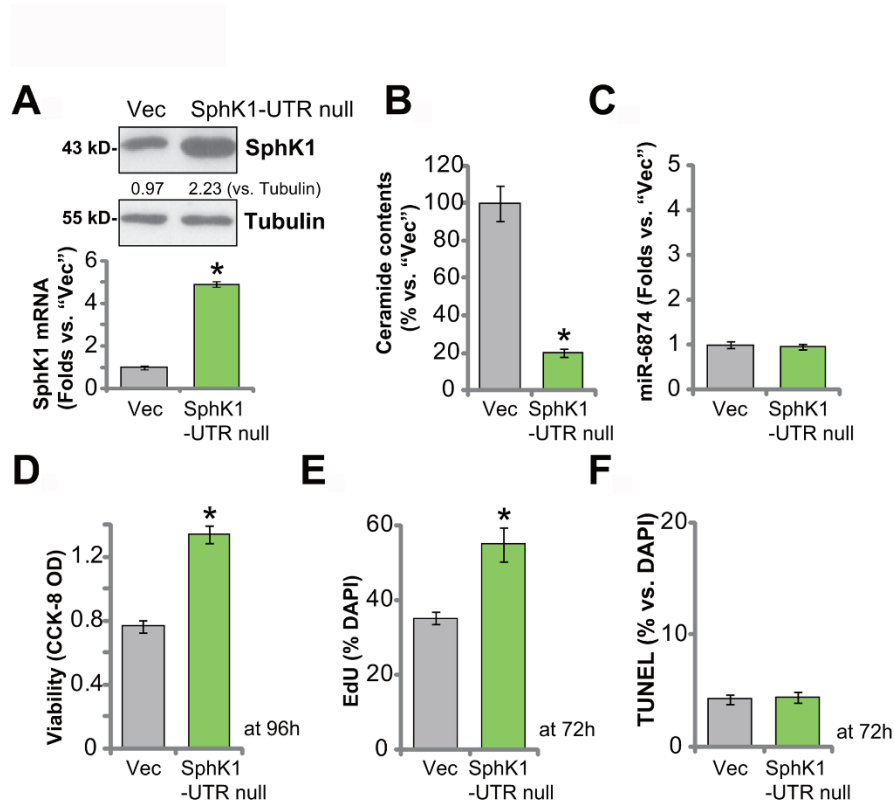

**Supplementary Figure 1.** A431 cells were transduced with an UTR-null SphK1 construct ("SphK1-UTR null") or the empty vector ("Vec"). Stable cells were established with puromycin selection. Expression SphK1/2 and miR-6784 was shown (A, C). Cellular ceramide contents were tested (B); Cells were further cultured for applied time periods, cell viability, proliferation, and apoptosis were tested by CCK-8 (D), EdU staining (E), and TUNEL staining (F) assays, respectively. Data were presented as mean  $\pm$  standard deviation (SD, n=5). Experiments in this study were repeated three times with similar results obtained. \* $p < 0.05$  vs. "Vec" cells.
